# Supplementary material for: Frugal alignment-free identification of FLT3-internal tandem duplications with FiLT3r
Source: PubMed Central journal article supplement (PMC9617311; doi:10.1186/s12859-022-04983-6), 2022-10-28
Supplement: 12859_2022_4983_MOESM8_ESM.pdf [file 12859_2022_4983_MOESM8_ESM.pdf]

| Sample File | Sample Name | OS | SQ |
|-------------|-------------|----|----|
|             |             |    |    |

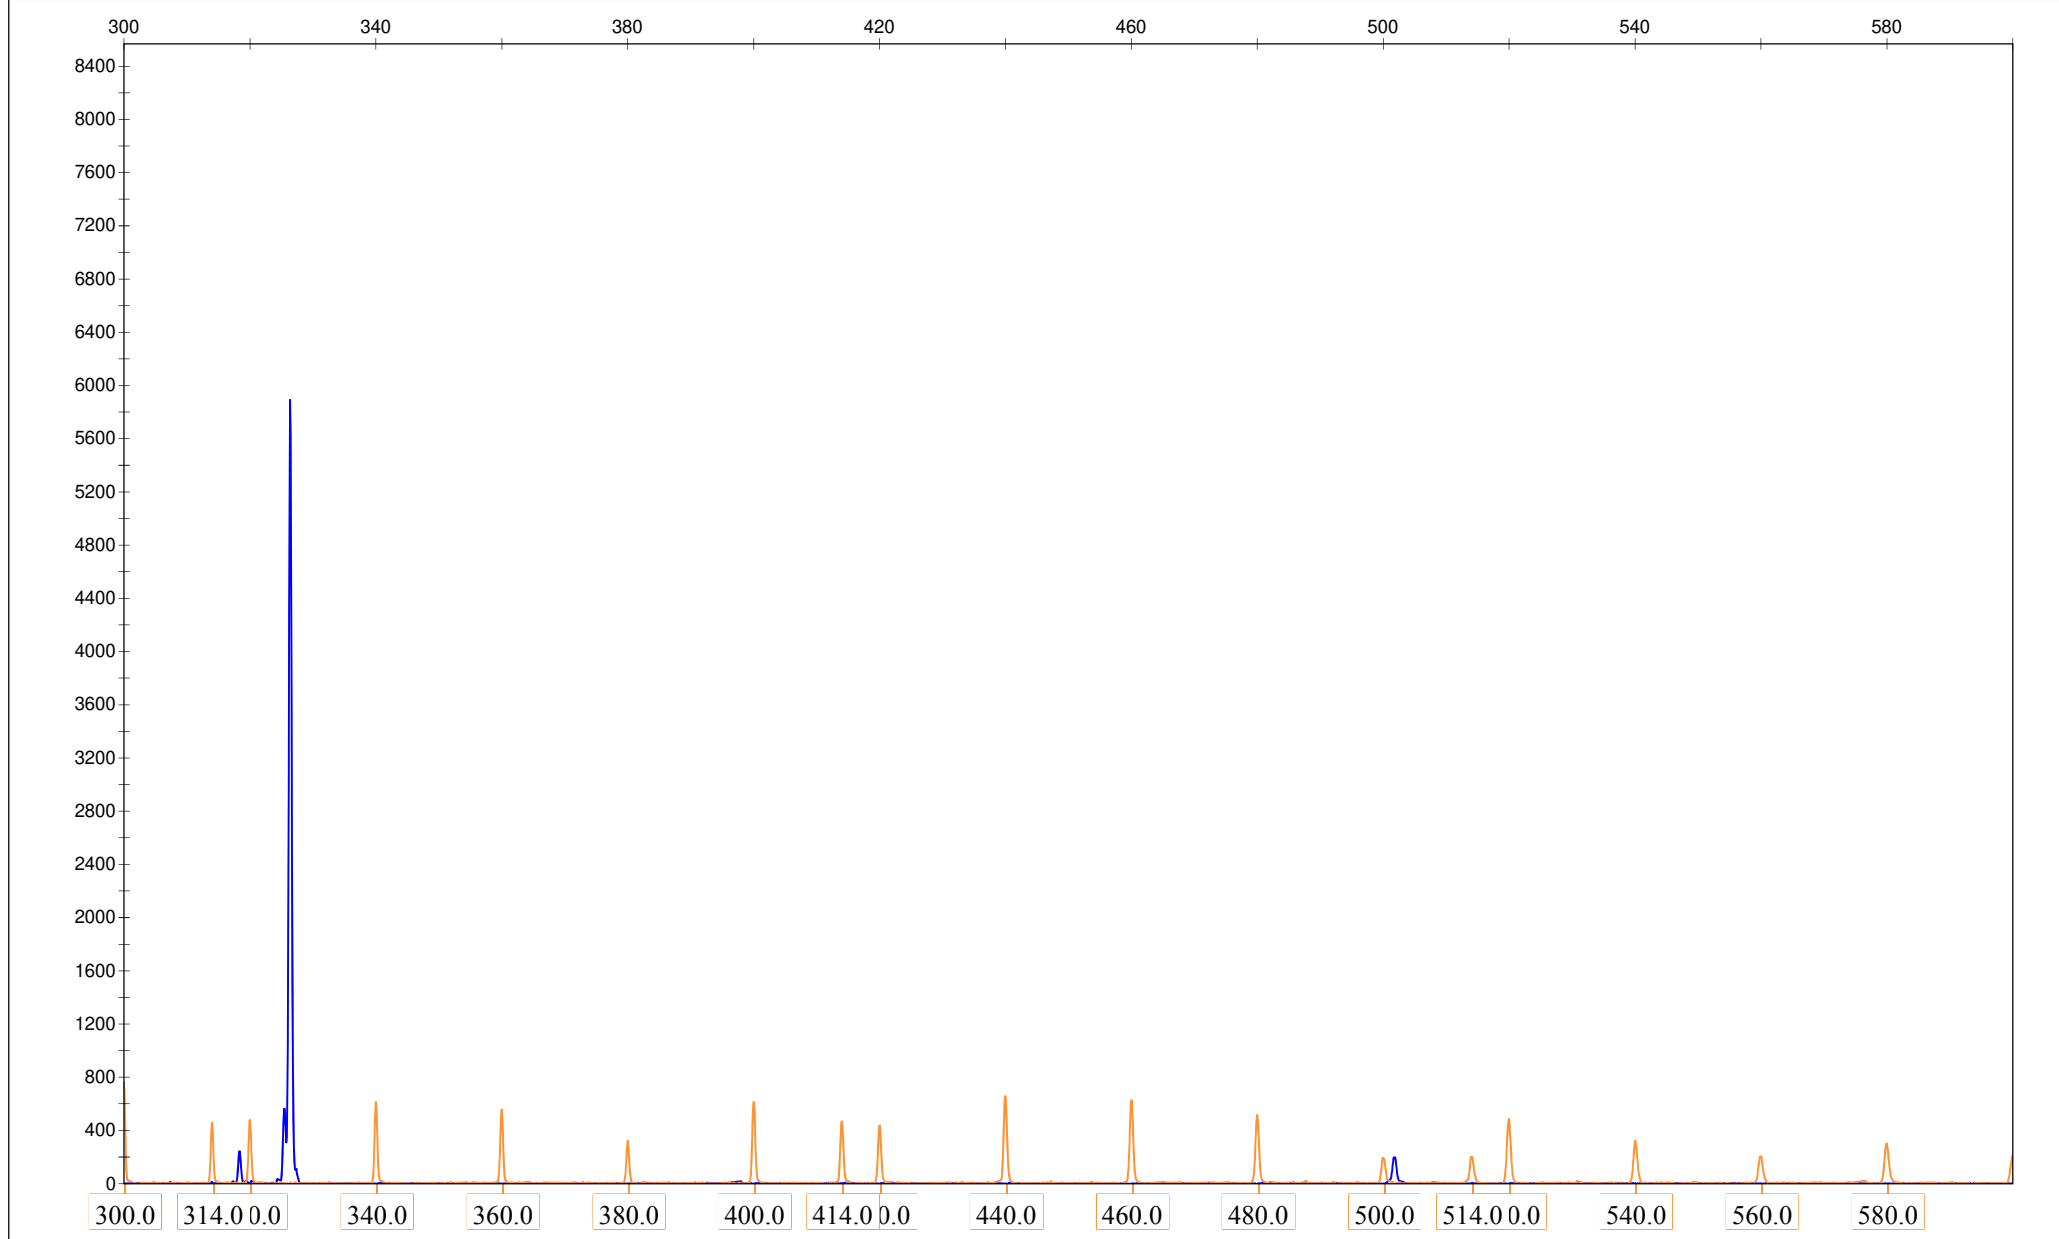

|   |   | Sample File Name | Size   | Height | Area  |
|---|---|------------------|--------|--------|-------|
| 1 | ■ |                  | 326.42 | 7772   | 61570 |
| 2 | ■ |                  | 501.78 | 281    | 3139  |
