# Supplementary material for: Frugal alignment-free identification of FLT3-internal tandem duplications with FiLT3r
Source: Springer Nature journal article supplement (doi:10.1186/s12859-022-04983-6), 2022-10-28

| Sample File | Sample Name | OS | SQ |
|-------------|-------------|----|----|
|             |             |    |    |

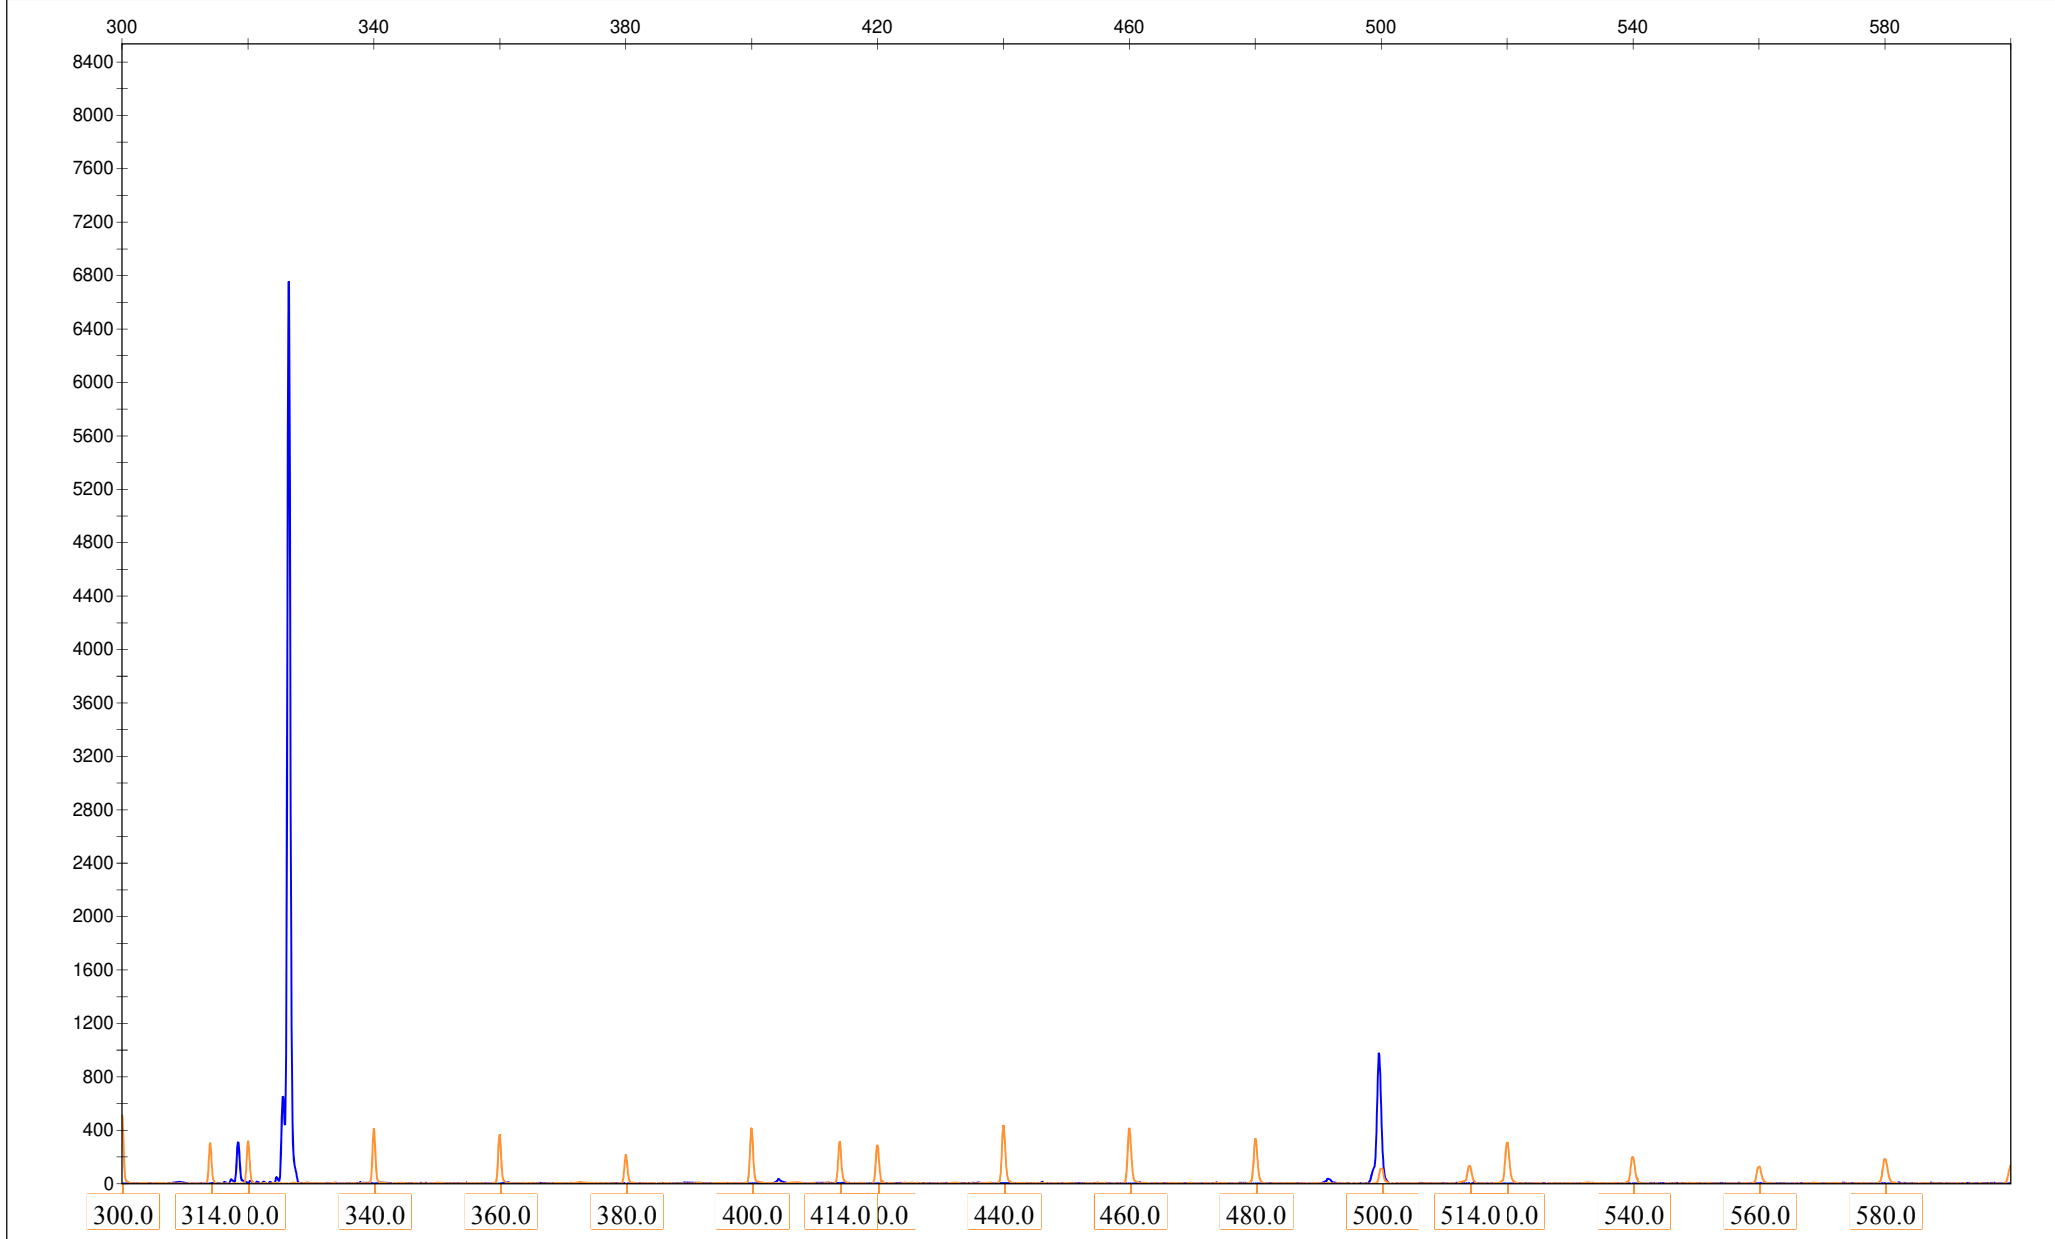

Supplement: 12859_2022_4983_MOESM9_ESM.pdf [file 12859_2022_4983_MOESM9_ESM.pdf]
